# Supplementary material for: Programmed Cell Death Ligand 1 Expression on Immune Cells and Survival in Patients With Nonmetastatic Head and Neck Cancer: A Systematic Review and Meta-analysis
Source: PubMed Central journal article supplement (PMC10066461; doi:10.1001/jamanetworkopen.2023.6324), 2023-03-31
Supplement: jamanetwopen-e236324-s001.pdf [file jamanetwopen-e236324-s001.pdf]

## Supplemental Online Content

Blažek T, Petráš M, Knybel L, Cvek J, Soumarová R. Programmed cell death ligand 1 expression on immune cells and survival in patients with nonmetastatic head and neck cancer: a systematic review and meta-analysis. *JAMA Netw Open*. 2023;6(3):e236324. doi:10.1001/jamanetworkopen.2023.6324

**eTable 1.** Search Strategy

**eTable 2.** Newcastle-Ottawa Scale Assessment of Quality of Included Studies

**eTable 3.** Quality Assessment of Risk of Bias of Included Studies With Quality in Prognosis Studies Tool

This supplemental material has been provided by the authors to give readers additional information about their work.

**eTable 1.** Search Strategy

|                                  |                                                                                                                                                                                                                                                                                                                                                                                                                                                                                                                                                                                                                |
|----------------------------------|----------------------------------------------------------------------------------------------------------------------------------------------------------------------------------------------------------------------------------------------------------------------------------------------------------------------------------------------------------------------------------------------------------------------------------------------------------------------------------------------------------------------------------------------------------------------------------------------------------------|
| <b>PubMed database</b>           |                                                                                                                                                                                                                                                                                                                                                                                                                                                                                                                                                                                                                |
|                                  | ((("Squamous Cell Carcinoma of Head and Neck"[Mesh] OR "Head and Neck Neoplasms"[Mesh] OR "Hypopharyngeal Neoplasms"[Mesh] OR "Otorhinolaryngologic Neoplasms"[Mesh] OR "Laryngeal Neoplasms"[Mesh] OR "Oropharyngeal Neoplasms"[Mesh] OR "Pharyngeal Neoplasms"[Mesh] OR "Gingival Neoplasms"[Mesh] OR "Palatal Neoplasms"[Mesh] OR "Parotid Neoplasms"[Mesh] OR "Mouth Neoplasms"[Mesh] OR "Tongue Neoplasms"[Mesh] OR "Tonsillar Neoplasms"[Mesh]) AND ("B7-H1 Antigen"[Mesh] OR "CD274 protein, human" [Supplementary Concept]) AND ("2010/01/01"[Date - Publication] : "2023/01/05"[Date - Publication])) |
| <b>MEDLINE STNext database</b>   |                                                                                                                                                                                                                                                                                                                                                                                                                                                                                                                                                                                                                |
|                                  | L1 QUE 2010-2022/PY                                                                                                                                                                                                                                                                                                                                                                                                                                                                                                                                                                                            |
| L2                               | QUE "SQUAMOUS CELL CARCINOMA OF HEAD AND NECK"/CT OR "HEAD AND NECK NEOPLASMS"/CT OR "HYPOPHARYNGEAL NEOPLASMS"/CT OR "OROPHARYNGEAL NEOPLASMS"/CT OR "LARYNGEAL NEOPLASMS"/CT OR "MOUTH NEOPLASMS"/CT OR "TONGUE NEOPLASMS"/CT                                                                                                                                                                                                                                                                                                                                                                                |
| L3                               | QUE HEAD OR NECK OR OTORHINOLARYNG* OR ORAL(W)CAVIT* OR OROPHARYNG* OR HYPOPHARYNG* OR LARYN* OR "ALVEOLAR RIDGE" OR TONGUE OR PALATE OR MOUTH OR TONSILLAR                                                                                                                                                                                                                                                                                                                                                                                                                                                    |
| L4                               | QUE *CANCER* OR *CARCINO* OR *NEOPLAS* OR *MALIGNAN* OR *TUMOR* OR *TUMOUR* OR MALIGNAN* OR ONCO* OR *LEUKEM* OR CHEMOTHERAP* OR CHEMO                                                                                                                                                                                                                                                                                                                                                                                                                                                                         |
| L5                               | QUE "B7-H1 ANTIGEN"/CT                                                                                                                                                                                                                                                                                                                                                                                                                                                                                                                                                                                         |
| L6                               | QUE PD(W)"L1" OR DEATH(W)"L1" OR DEATH(W)LIGAND(W)1 OR B7(W)H1 OR B7(W)HOMOLOG(W)1 OR CD274                                                                                                                                                                                                                                                                                                                                                                                                                                                                                                                    |
| L7                               | 861 SEA (L2 OR L3(3A)L4) AND (L5 OR L6/TI,AB) AND L1                                                                                                                                                                                                                                                                                                                                                                                                                                                                                                                                                           |
| <b>EMBASE STNext database</b>    |                                                                                                                                                                                                                                                                                                                                                                                                                                                                                                                                                                                                                |
| L8                               | QUE "HEAD AND NECK CANCER"/CT OR "HEAD AND NECK TUMOR"/CT OR "HEAD AND NECK CANCER CELL LINE"/CT OR "BENIGN HEAD AND NECK TUMOR"/CT OR "MOUTH CANCER"/CT OR "MOUTH TUMOR"/CT OR "TONGUE CANCER"/CT OR "TONGUE TUMOR"/CT                                                                                                                                                                                                                                                                                                                                                                                        |
| L9                               | QUE "PD L1 PROTEIN"/CT OR "PD L1 GENE"/CT OR "B7 H1 ANTIBODY"/CT OR "B7 H1 GENE"/CT OR "B7 H1 RECEPTOR"/CT                                                                                                                                                                                                                                                                                                                                                                                                                                                                                                     |
| L10                              | QUE "PROGRAMMED DEATH 1 LIGAND 1 INHIBITOR"/CT OR "PROGRAMMED DEATH LIGAND 1 ANTIBODY"/CT OR "PROGRAMMED DEATH LIGAND 1 INHIBITOR"/CT OR "PROGRAMMED DEATH RECEPTOR 1 ANTIBODY"/CT                                                                                                                                                                                                                                                                                                                                                                                                                             |
| L11                              | 1204 SEA (L8 OR L3(3A)L4) AND (L9 OR L10 OR L6/TI,AB) AND L1                                                                                                                                                                                                                                                                                                                                                                                                                                                                                                                                                   |
| <b>PQSCITECH STNext database</b> |                                                                                                                                                                                                                                                                                                                                                                                                                                                                                                                                                                                                                |

|                                |                                                                                                                                                                                                                        |
|--------------------------------|------------------------------------------------------------------------------------------------------------------------------------------------------------------------------------------------------------------------|
| L12                            | 166 SEA L3(3A)L4 AND L6/TI,AB AND L1                                                                                                                                                                                   |
| <b>HCAPLUS STNext database</b> |                                                                                                                                                                                                                        |
| L13                            | QUE "HEAD AND NECK SQUAMOUS CELL CARCINOMA"/CT OR "OROPHARYNGEAL NEOPLASM"/CT OR "HEAD AND NECK NEOPLASM"/CT OR "HYPOPHARYNGEAL NEOPLASM"/CT OR "LARYNGEAL NEOPLASM"/CT OR "MOUTH NEOPLASM"/CT OR "TONGUE NEOPLASM"/CT |
| L14                            | QUE "PROGRAMMED DEATH-LIGAND PD-L1"/CT OR "PROGRAMMED DEATH-LIGAND 1 INHIBITORS"/CT OR "PROGRAMMED DEATH-LIGAND 1"/CT                                                                                                  |
| L15                            | 858 SEA ((L13 OR L3(3A)L4) AND (L14 OR L6/TI,AB) AND L1) NOT P/DT                                                                                                                                                      |

**eTable 2.** Newcastle-Ottawa Scale Assessment of Quality of Included Studies

| Study                       | Selection                                |                                     |                           |                                                                          | Comparability                                                                              |                       | Outcome                                         |                                  | Total |
|-----------------------------|------------------------------------------|-------------------------------------|---------------------------|--------------------------------------------------------------------------|--------------------------------------------------------------------------------------------|-----------------------|-------------------------------------------------|----------------------------------|-------|
|                             | Representativeness of the exposed cohort | Selection of the non-exposed cohort | Ascertainment of exposure | Demonstration that outcome of interest was not present at start of study | Comparability of cohorts on the basis of the design or analysis controlled for confounders | Assessment of outcome | Was follow-up long enough for outcomes to occur | Adequacy of follow-up of cohorts |       |
| Adamski et al, 2021         | *                                        | *                                   | *                         | *                                                                        | **                                                                                         | *                     | *                                               | *                                | 9     |
| Fu et al, 2022              | *                                        | *                                   | *                         | *                                                                        | *                                                                                          | *                     | *                                               | *                                | 8     |
| Fukushima et al, 2018       | *                                        | *                                   | *                         | *                                                                        | **                                                                                         | *                     | *                                               | *                                | 9     |
| Hanna et al, 2018           | *                                        | *                                   | *                         | *                                                                        | **                                                                                         | -                     | *                                               | *                                | 8     |
| Hong et al, 2016            | *                                        | *                                   | *                         | *                                                                        | **                                                                                         | *                     | *                                               | *                                | 9     |
| Kim et al, 2016             | *                                        | *                                   | *                         | *                                                                        | **                                                                                         | *                     | *                                               | *                                | 9     |
| Lin et al, 2015             | *                                        | *                                   | *                         | *                                                                        | *                                                                                          | *                     | *                                               | *                                | 8     |
| Lyu et al, 2019             | *                                        | *                                   | *                         | *                                                                        | **                                                                                         | -                     | *                                               | *                                | 8     |
| Pena-Cardelles et al, 2022  | *                                        | *                                   | *                         | *                                                                        | **                                                                                         | *                     | *                                               | *                                | 9     |
| Sato et al, 2019            | *                                        | *                                   | *                         | *                                                                        | **                                                                                         | *                     | *                                               | *                                | 9     |
| Schenider et al, 2018       | *                                        | *                                   | *                         | *                                                                        | *                                                                                          | *                     | *                                               | *                                | 8     |
| Yang et al, 2018            | *                                        | *                                   | *                         | *                                                                        | **                                                                                         | *                     | *                                               | *                                | 9     |
| Zhou et al, 2020            | *                                        | *                                   | *                         | *                                                                        | **                                                                                         | *                     | *                                               | *                                | 9     |
| Balermipas et al, 2017      | *                                        | *                                   | *                         | *                                                                        | **                                                                                         | *                     | *                                               | *                                | 9     |
| Lilja-Fischer et al, 2020   | *                                        | *                                   | *                         | *                                                                        | *                                                                                          | *                     | *                                               | *                                | 8     |
| Sánchez-Canteli et al, 2020 | *                                        | *                                   | *                         | *                                                                        | *                                                                                          | *                     | *                                               | *                                | 8     |
| Ngamphaiboon et al, 2019    | *                                        | *                                   | *                         | *                                                                        | **                                                                                         | *                     | *                                               | *                                | 9     |

\* The studies were awarded stars in all categories with a maximum of 2 stars in category comparability of cohorts on the basis of the design or analysis. The total score ranged from 0 to 9 stars, and studies with a low risk of bias were awarded at least 7 stars.

**eTable 3.** Quality Assessment of Risk of Bias of Included Studies With Quality in Prognosis Studies Tool

| Study                       | Study Participation | Study Attrition | Prognostic factor | Outcome | Study con-founding | Analysis and reporting | Total Risk of Bias |
|-----------------------------|---------------------|-----------------|-------------------|---------|--------------------|------------------------|--------------------|
| Adamski et al, 2021         | ○                   | ○               | ○                 | ○       | ○                  | ○                      | Low                |
| Fu et al, 2022              | ○                   | ○               | ○                 | ○       | ●                  | ○                      | Moderate           |
| Fukushima et al, 2018       | ○                   | ○               | ○                 | ○       | ○                  | ○                      | Low                |
| Hanna et al, 2018           | ○                   | ○               | ○                 | ○       | ○                  | ●                      | Moderate           |
| Hong et al, 2016            | ○                   | ○               | ○                 | ○       | ○                  | ○                      | Low                |
| Kim et al, 2016             | ○                   | ○               | ○                 | ○       | ○                  | ○                      | Low                |
| Lin et al, 2015             | ○                   | ○               | ●                 | ○       | ○                  | ○                      | Moderate           |
| Lyu et al, 2019             | ○                   | ○               | ○                 | ○       | ○                  | ●                      | Moderate           |
| Peña-Cardelles et al, 2022  | ○                   | ○               | ○                 | ○       | ○                  | ○                      | Low                |
| Sato et al, 2019            | ○                   | ○               | ○                 | ○       | ○                  | ○                      | Low                |
| Schenider et al, 2018       | ○                   | ○               | ○                 | ○       | ●                  | ○                      | Moderate           |
| Yang et al, 2018            | ○                   | ○               | ○                 | ○       | ○                  | ○                      | Low                |
| Zhou et al, 2020            | ○                   | ○               | ○                 | ○       | ○                  | ○                      | Low                |
| Balermipas et al, 2017      | ○                   | ○               | ○                 | ○       | ○                  | ○                      | Low                |
| Lilja-Fischer et al, 2020   | ○                   | ○               | ○                 | ○       | ●                  | ○                      | Moderate           |
| Sánchez-Canteli et al, 2020 | ○                   | ○               | ○                 | ○       | ●                  | ○                      | Moderate           |
| Ngamphaiboon et al, 2019    | ○                   | ○               | ○                 | ○       | ○                  | ○                      | Low                |

The risk of bias for each domain was determined by counting the number of inadequate “no” rated items in each domain, with each domain containing 3–7 items.

○ – domain was rated as low risk, when there was no inadequate item

● – domain was rated as moderate risk, when there was at least one inadequate “no” rated item, with a maximum of 2–3, depending on the domain typ
