# Supplementary material for: Programmed Cell Death Ligand 1 Expression on Immune Cells and Survival in Patients With Nonmetastatic Head and Neck Cancer: A Systematic Review and Meta-analysis
Source: PubMed Central journal article supplement (PMC10066461; doi:10.1001/jamanetworkopen.2023.6324), 2023-03-31
Supplement: jamanetwopen-e236324-s002.pdf [file jamanetwopen-e236324-s002.pdf]

## Data Sharing Statement

Blažek. Programmed Cell Death Ligand 1 Expression on Immune Cells and Survival in Patients With Nonmetastatic Head and Neck Cancer: A Systematic Review and Meta-analysis. *JAMA Netw Open*. Published March 31, 2023. doi:10.1001/jamanetworkopen.2023.6324

### Data

**Data available:** Yes

**Data types:** Deidentified participant data

**How to access data:** Data will be available on the request on e-mail address - -

[tomas.blazek@fno.cz](mailto:tomas.blazek@fno.cz)

**When available:** With publication

### Supporting Documents

**Document types:** None

### Additional Information

**Who can access the data:** Data will be available to researchers whose proposed use of the data has been approved.

**Types of analyses:** Data from included studies and statistical analyses will be available for any purpose.

**Mechanisms of data availability:** Data will be available after approval with signed data access agreement.
